# Supplementary material for: Use of RNA-Protein Complexes for Genome Editing in Non-albicans Candida Species
Source: PubMed Central journal article supplement (PMC5480035; doi:10.1128/msphere.00218-17), 2017-06-21
Supplement: sph003172302sf3.pdf [file sph003172302sf3.pdf]

```

Ca_CAT1 -----MAPFTTNSNGQPIPEPFATQRVGQHGPLLLQDFNLIDSLAHFDRERIP
Cg_CTA1 MSANPTNTSDVRGDRVVTNSTGYPYNDPFATQRVGQHGPLLLQDANLIDSLAHFNRRERIP
Cl_CLUG_04072 -----MAPFTTNSNGCPIPEPFATQRVGKHGPLLLQDFNLIDSLAHFDRERIP
Cau_QG37_05843_05842 -----MAPPTYTNSQGCPPEPFATQRVGQHGPLLLQDFNLIDSLAHFDRERIP
          . *** * * :*****:*****:* *****:*****
          QG37_05843
Ca_CAT1 ERVVHAKGSGAYGVFEVTDITDICAAKFLDVGKKTRIFTRFSTVGGELGSADTARDPR
Cg_CTA1 ERNPHAHSGAFGYFEVTDITDICGSAMFSEIGKRTRFLTRFSTVGGEGKSADTARDPR
Cl_CLUG_04072 ERVVHAKGSGAYGVFEVTDITDICSSKFLDVGKKTKVFTRFSTVGGESGSPDTARDPR
Cau_QG37_05843_05842 ERVVHAKGSGAYGVFEVTDITDICSSKMFHVGGKTRFTTRFSTVGGESGSADTARDPR
** **:****:* *****:*****: :. :. **:*: :***** ** *****
-----
Ca_CAT1 GFATKIFYTEEGNLDLVYNNTPVFFIRDPSKFPFHIHTQKRNPETHLKDANMFWDYLTNSNE
Cg_CTA1 GFATKIFYTEEGNLDWVYNNTPIFFIRDPSKFPFHIHTQKRNPQTNLKDPMFWDYLTTPPE
Cl_CLUG_04072 GFSTKLYTEEGNLDLVYNNTPVFFIRDPSKFPFHIHTQKRNPQTHLKDANMFWDYLTNSNE
Cau_QG37_05843_05842 GFSTKIFYTEEGNLDWVYNNTPVFFIRDPSKFPFHIHTQKRNPETNLKDANMFWDYLCNNP
** **:****:***** *****:*****:*****: :. **:**** *****
-----
Ca_CAT1 --ESIHQVMVLFSDRGTTPASYREMNGYSGHYKWSNKKGEWFYVQVHFISDQGIKTLTNE
Cg_CTA1 NQVAVHQMLILFSDRGTTPASYRHMNGYSGHYKWSNKKGEWHYVQVHILTDQGIKNLTND
Cl_CLUG_04072 --ESVHQVTTLFSDRGTTPRSYREMNGYSGHYKWSTKDGNWHYVQVHFISDQGVKTLTNE
Cau_QG37_05843_05842 --ESIHQVVILFSDRGTTPASYREMNGYSGHYKWSTKDGNWHYVQVHMISDQGNKGLTNE
: :. **: ***** **.******: :. **:***** : :. ** * ** :
          QG37_05842
Ca_CAT1 EAGALAGSNPDYAQEDLFKNIAGNPSWTAYIQTMTEAEAKEAEFSVFDLTKVWPHKDY
Cg_CTA1 EAVEIAGKNPDYCOQDLYENIAKGNPSWTVYIQTMTEAQAKLPFSVFDLTKVWPHKDF
Cl_CLUG_04072 EAGELAGSNPDHAQEDLFRNIAGNFPSWTCYIQTMTEAQAKEAPFSVFDLTKVWPHKDY
Cau_QG37_05843_05842 EATELAGTNPDHAQEDLFKNIAGNFPSWTCYIQTMTEAQAKQAPFSVFDLTKVWPHKDY
** :*.***: :. **:*.*** **:* ** * ** * :. **: ***** :. :
-----
Ca_CAT1 PLRRFGKFTLNENPKNYFAEVEQAASFPAHTVPYMEPSADPVLQSRFLSYADTHRRLGT
Cg_CTA1 PLRRVKGMMNENPLNYFASIEQAASFPAHTVPYQEPSADPVLQSRFLFAYADAHRYRLGA
Cl_CLUG_04072 PLRRFGKFTLNENPKNYFAEVEQAASFPAHTVPYMEPSADPVLQSRFLSYADTHRRLGP
Cau_QG37_05843_05842 PMRRFGKFTLNENPKNYFAEVEQAASFPSHTVPYQEASADPVLQSRFLSYPDTHRRLGT
*:*.***: :. **: ***** :. **:***** :. **: * *****: * **:***
-----
Ca_CAT1 NYTQIPVNCPTGAVFNPHMRDGMTVNGNLGSHPNYLASDKPVEF--KQFSLOEDQEVW
Cg_CTA1 NFHQIPVNCPYASKFFNPVIRDGPMNVVDGNFNEPNYASNKQYQIPNQDRPIQHQEVW
Cl_CLUG_04072 NYTQIPVNCPTIG--VYNPHMRDGMNVNGNLGSAPNYLATSEPIEF--RQFSIQEDQEVW
Cau_QG37_05843_05842 NYSQIPVNCPVASQVYAPHIRNGAMTVNGNLGSTPNYVSSFNPMQF--REFSQQDQEVW
*: ***** :. :. * :*: * * :*: * * * * : : : : : : * :. ****
-----
Ca_CAT1 NGAATPFHWKATPA--DFKQAOELWVKLRYPNQOEHLAHNIAVHAAGADAAIQDRVFAY
Cg_CTA1 NGPAQPFHWATSPGIDFVQARDLYKVLGKQKQDQOEHLAYNIGTHVAGADPEIQORVIDM
Cl_CLUG_04072 NGAACPFHWKATED--EFTQATALYNVLGRYPGQKLNLAHNVAHVSAADKPIQERVIKY
Cau_QG37_05843_05842 TGAACPFHWKATDA--EYTOATALYHVLAKYPNQQRNLAHNVAVHAAGADPSVQDRVFEL
.* * **** : : : * * * : * : * * : * * : * * : * * : * * : * * : * * : * * :
-----
Ca_CAT1 FGKVSQDLADAIKKEVLELSPRK*----
Cg_CTA1 FSRVDEGLGANIRKEIEKNASAPTAKI*
Cl_CLUG_04072 FGKVSPELAANIRKELEAN*-----
Cau_QG37_05843_05842 FTRVHPDLGAAIKKEVLELSPRK*----
* : * * * : * : * : * :

```

**Figure S1.** Alignment to compare the catalase protein sequences of *C. lusitaniae*, *C. glabrata* and *C. auris* to *Candida albicans* Cat1. Protein sequences were retrieved from the *Candida* genome database or NCBI and sequences were aligned using the Clustal Omega multiple sequence alignment tool. The two *C. auris* ORF annotations that made up the *CAT1* gene are indicated in red (QG37\_05843) or blue (QG37\_05842).
