# Supplementary material for: Use of RNA-Protein Complexes for Genome Editing in Non-albicans Candida Species
Source: PubMed Central journal article supplement (PMC5480035; doi:10.1128/msphere.00218-17), 2017-06-21
Supplement: sph003172302st1.pdf [file sph003172302st1.pdf]

**Table S1. Strains used in these studies.**

| <b>Strain</b>                                   | <b>Lab #</b> | <b>Genotype</b>                                                   | <b>Source</b>                               |
|-------------------------------------------------|--------------|-------------------------------------------------------------------|---------------------------------------------|
| <i>C. lusitaniae</i> A04<br>(haploid)           | DH2949       | Parent, Nat <sup>S</sup>                                          | Dartmouth<br>Hitchcock<br>Medical<br>Center |
| <i>C. auris</i> CAU-10                          | DH2777       | Parent, Nat <sup>S</sup>                                          | Centers for<br>Disease<br>Control           |
| <i>C. glabrata</i><br>ATCC2001                  | DH2788       | Parent, Nat <sup>S</sup>                                          | Scott Moye-<br>Rowley                       |
| <i>C. lusitaniae</i><br><i>cat1</i> $\Delta$ -a | DH2945       | Deletion of<br><i>CLUG_04072</i> , Nat <sup>R</sup> ,<br>clone 6  | This study                                  |
| <i>C. lusitaniae</i><br><i>cat1</i> $\Delta$ -b | DH2946       | Deletion of<br><i>CLUG_04072</i> , Nat <sup>R</sup> ,<br>clone 13 | This study                                  |
| <i>C. lusitaniae</i><br><i>cat1</i> $\Delta$ -c | DH2947       | Deletion of<br><i>CLUG_04072</i> , Nat <sup>R</sup> ,<br>clone 18 | This study                                  |
| <i>C. lusitaniae</i><br><i>cat1</i> $\Delta$ -d | DH2948       | Deletion of<br><i>CLUG_04072</i> , Nat <sup>R</sup> ,<br>clone 21 | This study                                  |
| <i>C. auris cat1</i> $\Delta$ -a                | DH2950       | Deletion of QG_05843-<br>05842, Nat <sup>R</sup> , clone 1        | This study                                  |
| <i>C. auris cat1</i> $\Delta$ -b                | DH2951       | Deletion of QG_05843-<br>05842, Nat <sup>R</sup> , clone 3        | This study                                  |
| <i>C. auris cat1</i> $\Delta$ -c                | DH2952       | Deletion of QG_05843-<br>05842, Nat <sup>R</sup> , clone 5        | This study                                  |
| <i>C. auris cat1</i> $\Delta$ -d                | DH2953       | Deletion of QG_05843-<br>05842, Nat <sup>R</sup> , clone 10       | This study                                  |
| <i>C. glabrata cta1</i> $\Delta$ -a             | DH2954       | Deletion of <i>CTA1</i> , Nat <sup>R</sup> ,<br>clone 4           | This study                                  |
| <i>C. glabrata cta1</i> $\Delta$ -b             | DH2955       | Deletion of <i>CTA1</i> , Nat <sup>R</sup> ,<br>clone 5           | This study                                  |
| <i>C. glabrata cta1</i> $\Delta$ -c             | DH2956       | Deletion of <i>CTA1</i> , Nat <sup>R</sup> ,<br>clone 7           | This study                                  |
| <i>C. glabrata cta1</i> $\Delta$ -d             | DH2957       | Deletion of <i>CTA1</i> , Nat <sup>R</sup> ,<br>clone 8           | This study                                  |
