# Supplementary material for: Use of RNA-Protein Complexes for Genome Editing in Non-albicans Candida Species
Source: PubMed Central journal article supplement (PMC5480035; doi:10.1128/msphere.00218-17), 2017-06-21
Supplement: sph003172302st2.pdf [file sph003172302st2.pdf]

Table S2. Sequences of primers and crRNAs used in this study. The sequences in bold represent sequences present in the *NAT1* cassette.

| Primer Type  | name                                | gene                                 | sequence                                                 |
|--------------|-------------------------------------|--------------------------------------|----------------------------------------------------------|
| 9            | NG_087                              | <i>NAT1</i>                          | GAAGTTCAGTTGATCCACCATTGA                                 |
| 10           | rev seq NAT1                        | <i>NAT1</i>                          | CGATGGTACTGCTTCCGATGG                                    |
| 1            | NG_128_CLUG_04072_left flank_fw     | <i>Candida lusitanae</i> CLUG_04072  | AGAGGTAGTTACTAACAAGGAAG                                  |
| 2            | NG_129_CLUG_04072_left flank_rev    | <i>Candida lusitanae</i> CLUG_04072  | <b>AACGTCGTGACTGGGAAAaaTCATTACTTACTCATGCTGACGCAACTA</b>  |
| 5            | NG_130_CLUG_04072_CRISPR_fw         | <i>Candida lusitanae</i> CLUG_04072  | TAGTTGCGTCAGCATGAGTAAGTAATGAhTTTTCCAGTCACGACGTT          |
| 6            | NG_131_CLUG_04072_CRISPR_rev        | <i>Candida lusitanae</i> CLUG_04072  | TCCTTTGCTGGTCTCGTATTTCTG <b>TGGAATTGTGAGCGGATA</b>       |
| 3            | NG_132_CLUG_04072_right flank_fw    | <i>Candida lusitanae</i> CLUG_04072  | <b>TATCCGCTCACAATTCACGAAATACGAGACCAGCAAAGGA</b>          |
| 4            | NG_133_CLUG_04072_right flank_rev   | <i>Candida lusitanae</i> CLUG_04072  | AGGCTTACACGTTAGACTGTTC                                   |
| 7            | NG_134_CLUG_04072_CRISPR_nested_fw  | <i>Candida lusitanae</i> CLUG_04072  | AAGTTACCGTGTTTGCATTCTC                                   |
| 8            | NG_135_CLUG_04072_CRISPR_nested_rev | <i>Candida lusitanae</i> CLUG_04072  | CTGCTCTAAGGTCATAGCATAAA                                  |
| 1            | NG_140_Cg_CTA1_left flank_fw        | <i>Candida glabrata</i> CTA1         | CTGGTCGTTCAACTGAGAAAGT                                   |
| 2            | NG_141_Cg_CTA1_left flank_rev       | <i>Candida glabrata</i> CTA1         | <b>AACGTCGTGACTGGGAAAaaTCATTAAGGATAAAGGATGTGTTCCAAGG</b> |
| 5            | NG_142_Cg_CTA1_CRISPR_fw            | <i>Candida glabrata</i> CTA1         | CCTTGGAACACATCCTTTATCCT <b>TAATGAhTTTTCCAGTCACGACGTT</b> |
| 6            | NG_143_Cg_CTA1_CRISPR_rev           | <i>Candida glabrata</i> CTA1         | TTTACAGCACTTACGTGGTTC <b>GTGGAATTGTGAGCGGATA</b>         |
| 3            | NG_144_Cg_CTA1_right flank_fw       | <i>Candida glabrata</i> CTA1         | <b>TATCCGCTCACAATTCACGAAACACGTAAGT</b> GCTGTAAA          |
| 4            | NG_145_Cg_CTA1_right flank_rev      | <i>Candida glabrata</i> CTA1         | CCTGCGTTGTAACTGTCTTG                                     |
| 7            | NG_146_Cg_CTA1_CRISPR_nested_fw     | <i>Candida glabrata</i> CTA1         | AGAAAGTTCAGCTTCTAAGCTATT                                 |
| 8            | NG_147_Cg_CTA1_CRISPR_nested_rev    | <i>Candida glabrata</i> CTA1         | AGGCTCTTGATGGTTTGCTC                                     |
| 1            | NG_150_Cau_left flank_fw            | <i>Candida auris</i> Q37_05842_05843 | CTGAGCAGCAACTACTCATACA                                   |
| 2            | NG_151_Cau_left flank_rev           | <i>Candida auris</i> Q37_05842_05843 | <b>AACGTCGTGACTGGGAAAaaTCATTAAGCAGCCTTTATATACCCATGA</b>  |
| 5            | NG_152_Cau_05842_05843_CRISPR_fw    | <i>Candida auris</i> Q37_05842_05843 | TCATGGGTATATAAAGGCTGCCT <b>TAATGAhTTTTCCAGTCACGACGTT</b> |
| 6            | NG_153_Cau_05842_05843_CRISPR_rev   | <i>Candida auris</i> Q37_05842_05843 | TTACATCACGTAGGCTTGTAGCG <b>TGGAATTGTGAGCGGATA</b>        |
| 3            | NG_154_Cau_right flank_fw           | <i>Candida auris</i> Q37_05842_05843 | <b>TATCCGCTCACAATTCACGCTACAAAGCCTACGTGATGTAA</b>         |
| 4            | NG_155_Cau_right flank_rev          | <i>Candida auris</i> Q37_05842_05843 | GCTACGTTGCTGGTACTACTAAG                                  |
| 7            | NG_156_Cau_CRISPR_nested_fw         | <i>Candida auris</i> Q37_05842_05843 | GCAGAAATCTGACCTGACACT                                    |
| 8            | NG_157_Cau_CRISPR_nested_rev        | <i>Candida auris</i> Q37_05842_05843 | ATCACCTCTTTCTTCCTCATC                                    |
|              |                                     |                                      |                                                          |
| <b>crRNA</b> | <b>name</b>                         | <b>gene</b>                          | <b>sequence</b>                                          |
|              | crRNA_CLUG_04072                    | <i>Candida lusitanae</i> CLUG_04072  | TTTGCCTGGGATAAAAGTGG                                     |
|              | crRNA_Cg_CTA1                       | <i>Candida glabrata</i> CTA1         | ACCAGATTCTCCACTGTCCG                                     |
|              | crRNA_Cau_05842_3                   | <i>Candida auris</i> Q37_05842_05843 | ACTAGATTCTCCACCGTCCG                                     |
|              |                                     |                                      |                                                          |
